# Supplementary material for: CFH Y402H and ARMS2 A69S Polymorphisms and Oral Supplementation with Docosahexaenoic Acid in Neovascular Age-Related Macular Degeneration Patients: The NAT2 Study
Source: PubMed Central journal article supplement (PMC4489493; doi:10.1371/journal.pone.0130816), 2015-07-01
Supplement: pone.0130816.s003.pdf [file pone.0130816.s003.pdf]

gen\_cnv

| idnat2 | tg1  | hdl_c1 | ldl_c1 | epadhas1 | epadharbc1 | epadhas5 | epadharbc5 | TREAT |
|--------|------|--------|--------|----------|------------|----------|------------|-------|
| 1      | 1.75 | 2.6    | 4.95   | 1.9      | 4.8        | 6.425124 | 9.593986   | 1     |
| 2      | 0.92 | 3.67   | 3.06   | 1.8      | 3.6        | 4.740707 | 8.032918   | 1     |
| 3      | 2.07 | 1.28   | 5.95   | 1.7      | 4.4        | 0.900128 | 3.570385   | 0     |
| 4      | 1.37 | 1.51   | 3.47   | 2.1      | 4.7        | 2.72924  | 5.07172    | 0     |
| 5      | 0.85 | 1.22   | 4.35   | 2.2      | 4          | 1.836421 | 4.287468   | 0     |
| 6      | 1.32 | 1.59   | 4.93   | 1.7      | 4.9        | 3.730833 | 4.54886    | 1     |
| 7      | 1.57 | 1.31   | 4.96   | 1.9      | 4          | 1.15735  | 4.495858   | 0     |
| 8      | 1.45 | 1.27   | 4.94   | 1.6      | 3.8        | 3.000864 | 6.562664   | 1     |
| 9      | 1.57 | 0.95   | 6.06   | 1.4      | 3.5        | 0.716598 | 3.109495   | 0     |
| 10     | 1.43 | 2.03   | 3.73   | 2.2      | 3.7        | 3.1315   | 5.393767   | 1     |
| 12     | 0.62 | 2.07   | 3.33   | 1.8      | 4.3        | 1.721036 | 3.440048   | 0     |
| 13     | 0.71 | 1.94   | 4.41   | 1.5      | 3.4        | 3.863    | 6.526      | 1     |
| 14     | 1.34 | 1.04   | 3.3    | 1.9      | 4.7        | 2.847    | 5.183      | 0     |
| 15     | 0.79 | 1.56   | 7.9    | 1.8      | 2.9        | 3.571207 | 7.634886   | 1     |
| 16     | 0.75 | 0.89   | 3.69   | 1.3      | 4          | 1.365428 | 3.664564   | 0     |
| 17     | 1.16 | 1.46   | 3.25   | 1.7      | 4.2        | 1.394177 | 4.687056   | 0     |
| 18     | 1    | 1.62   | 3.63   | 2.5      | 4.5        | 1.152148 | 3.275277   | 0     |
| 19     | 1.95 | 1      | 4.82   | 1.3      | 5.6        | 4.259715 | 8.136066   | 1     |
| 21     | 0.83 | 1.67   | 3.45   | 1.9      | 3          | 2.034215 | 4.968078   | 1     |
| 22     | 0.88 | 0.99   | 4.78   | 2.1      | 4.4        | 1.670896 | 4.959265   | 0     |
| 23     | 1.29 | 2.15   | 5.71   | 1.9      | 5.3        | 2.118318 | 7.016832   | 1     |
| 24     | 0.48 | 2.34   | 3.78   | 2.9      | 5.3        | 1.595373 | 3.545398   | 0     |
| 25     | 0.75 | 1.15   | 2.48   | 5.8      | 5.5        | 2.404675 | 4.996608   | 0     |
| 26     | 2.05 | 1.17   | 3.54   | 2.3      | 4.1        | 2.053232 | 5.210252   | 1     |
| 27     | 1.19 | 1.27   | 3.66   | 1.6      | 5.5        | 1.233416 | 3.764514   | 0     |
| 28     | 0.7  | 2.4    | 2.59   | 1.4      | 3.1        | 1.192187 | 2.651749   | 1     |
| 29     | 1.39 | 2.04   | 3.39   | 1.9      | 5.4        | 1.587562 | 2.504725   | 0     |
| 30     | 1.8  | 1.88   | 7.05   | 1.5      | 4.2        | 2.687932 | 4.610372   | 1     |
| 31     | 0.69 | 1.53   | 4.14   | 2.3      | 4.4        | 1.842538 | 3.305597   | 0     |
| 32     | 0.45 | 2.37   | 3.13   | 2.5      | 5.9        | 3.153532 | 4.208435   | 1     |
| 33     | 0.62 | 1.92   | 3.94   | 5.2      | 6.8        | 4.350154 | 4.339      | 0     |
| 34     | 1.41 | 2.73   | 5.86   | 1.9      | 4.9        | 1.56381  | 3.765099   | 0     |
| 35     | 0.76 | 1.48   | 3.77   | 2.1      | 4.2        | 4.143931 | 7.358682   | 1     |
| 36     | 0.5  | 1.02   | 3.57   | 3.5      | 6.4        | 5.125645 | 8.703557   | 1     |
| 37     | 1.45 | 1.15   | 5.3    | 2.9      | 6.1        |          |            | 1     |
| 38     | 1.23 | 0.86   | 4.21   | 1.7      | 4.8        | 3.682398 | 6.125122   | 0     |
| 39     | 1.05 | 1.4    | 4.78   | 2.6      | 5          |          |            | 1     |
| 41     | 1.54 | 0.71   | 2.87   | 2.4      | 4.3        | 2.38239  | 6.326948   | 1     |
| 42     | 1.1  | 1.52   | 4.75   | 1.9      | 3.5        | 1.541995 | 2.853099   | 0     |
| 43     | 0.56 | 2.66   | 2.97   | 3.6      | 5.2        | 2.20475  | 4.307804   | 0     |
| 44     | 1.06 | 2.04   | 4.04   | 1.6      | 4.3        | 4.613674 | 7.600223   | 1     |
| 48     | 0.65 | 1.11   | 4.77   | 3.1      | 5          | 2.296883 | 5.594227   | 0     |
| 50     | 1.38 | 1.17   | 2.29   | 2.1      | 5.7        | 3.387121 | 8.190334   | 1     |
| 51     | 1.46 | 1.3    | 3.75   | 3.7      | 5.8        | 7.3257   | 5.998034   | 0     |
| 52     | 1.24 | 1.32   | 5.29   | 2        | 5.2        | 5.540209 | 9.209639   | 1     |
| 53     | 0.72 | 1.63   | 3.47   | 2.3      | 4.3        | 1.657914 | 4.880632   | 0     |
| 54     | 1.03 | 1.97   | 4.66   | 1.7      | 4.6        | 3.260518 | 7.223338   | 1     |
| 55     | 0.82 | 1.28   | 3.97   | 1.2      | 3.8        | 1.373862 | 2.90724    | 0     |
| 56     | 1.52 | 0.96   | 4.64   | 1.6      | 2.8        | 1.612849 | 4.73519    | 1     |
| 57     | 0.95 | 1.66   | 3.89   | 1.7      | 3.6        | 1.71064  | 3.622102   | 0     |
| 58     | 0.9  | 1.07   | 5.08   | 2.2      | 5.6        | 2.386166 | 6.138648   | 0     |

gen\_cnv

|     |      |      |      |     |     |          |          |  |   |
|-----|------|------|------|-----|-----|----------|----------|--|---|
| 59  | 1.4  | 1.34 | 4.74 | 3.2 | 5.1 |          |          |  | 1 |
| 60  | 0.49 | 2.64 | 3.04 | 2.8 | 4.9 | 4.506487 | 7.434927 |  | 1 |
| 61  | 1.07 | 2.12 | 3.07 | 3.1 | 5.9 | 3.223834 | 4.614152 |  | 0 |
| 62  | 0.58 | 1.99 | 4.23 | 2   | 3.2 | 2.467045 | 5.878537 |  | 0 |
| 63  | 0.8  | 1.16 | 4.29 | 2   | 4.1 | 2.74831  | 5.386194 |  | 1 |
| 64  | 1    | 1.58 | 5.37 | 2.2 | 3.9 | 4.678499 | 8.777464 |  | 1 |
| 66  | 0.5  | 1.74 | 3.64 | 1.4 | 2.2 | 4.500437 | 7.082959 |  | 1 |
| 67  | 0.46 | 1.99 | 3.59 | 2.7 | 3.4 | 2.022617 | 4.356431 |  | 0 |
| 68  | 1.15 | 1.21 | 5.35 | 2.3 | 3.5 | 5.282904 | 9.194794 |  | 1 |
| 69  | 0.62 | 2.27 | 3.35 | 3.4 | 4   |          |          |  | 0 |
| 70  | 1.01 | 1.37 | 6.37 | 3.4 | 3.2 | 4.158435 | 7.6343   |  | 1 |
| 71  | 0.54 | 1.73 | 3.95 | 2.8 | 1.9 | 3.492312 | 8.51369  |  | 1 |
| 72  | 1.79 | 1.36 | 6    | 2.4 | 5   | 1.459783 | 3.382987 |  | 0 |
| 74  | 1.27 | 0.85 | 3.99 | 2.4 | 4.9 | 2.973321 | 5.094925 |  | 0 |
| 76  | 0.97 | 1.98 | 5.15 | 1.9 | 2.1 | 4.8      | 9.9      |  | 1 |
| 77  | 0.67 | 1.09 | 4.06 | 1.7 | 3.7 | 1.373045 | 2.666149 |  | 0 |
| 78  | 0.7  | 1.37 | 3.99 | 2.9 | 6.6 | 3.227044 | 6.930944 |  | 1 |
| 79  | 1.94 | 1.78 | 4.66 | 1.4 | 4.6 | 0.967025 | 5.128205 |  | 0 |
| 81  | 2.95 | 1.5  | 4.13 | 1.9 | 5.4 | 3.31773  | 7.903377 |  | 1 |
| 82  | 0.38 | 2.56 | 3.23 | 3.4 | 6.2 | 6.198274 | 8.833962 |  | 1 |
| 84  | 0.4  | 2.16 | 3.27 | 3.7 | 5.2 | 3.732054 | 5.331529 |  | 0 |
| 87  | 0.74 | 1.08 | 4.51 | 2.2 | 5.2 | 4.252387 | 6.897138 |  | 1 |
| 88  | 0.69 | 1.74 | 3.11 | 2.4 | 4.8 | 2.127701 | 3.828281 |  | 0 |
| 89  | 1.01 | 0.99 | 4.47 | 2.5 | 5.7 | 2.155888 | 4.929596 |  | 0 |
| 90  | 0.82 | 1.57 | 5.94 | 3.1 | 5.4 | 1.487    | 3.910723 |  | 0 |
| 91  | 0.49 | 2.3  | 4.34 | 4   | 6.2 | 7.014133 | 7.899926 |  | 1 |
| 92  | 1.25 | 1.46 | 2.35 | 1.7 | 4.9 | 3.837765 | 6.174066 |  | 1 |
| 93  | 1.32 | 1.08 | 3.77 | 2.7 | 6   | 2.294111 | 4.810651 |  | 0 |
| 95  | 1.14 | 0.98 | 4.73 | 1.3 | 4.4 |          |          |  | 0 |
| 96  | 1.13 | 1.86 | 3.69 | 2.6 | 3.5 | 4.45473  | 7.575283 |  | 1 |
| 97  | 1.13 | 1.84 | 2.78 | 3.1 | 7.5 | 3.237    | 5.687    |  | 1 |
| 99  | 1.12 | 2.32 | 4.03 | 1.8 | 4.5 | 1.552941 | 2.981019 |  | 0 |
| 101 | 0.6  | 2.02 | 3.54 | 2.2 | 3.7 | 2.409556 | 3.753425 |  | 0 |
| 102 | 1.28 | 1.33 | 3.56 | 2.1 | 3.5 | 1.30668  | 3.334602 |  | 0 |
| 104 | 2.17 | 1.41 | 4.64 | 1.9 | 4.3 | 5.878537 | 9.030233 |  | 1 |
| 105 | 1.19 | 1.77 | 3.52 | 1.5 | 3.6 | 3.587558 | 5.264367 |  | 1 |
| 106 | 2.12 | 1.93 | 3.54 | 3   | 6   | 2.586463 | 4.25236  |  | 1 |
| 107 | 0.41 | 3.15 | 2.83 | 2.7 | 4.9 | 1.165325 | 2.978088 |  | 0 |
| 108 | 1.19 | 1.42 | 3.3  | 2.3 | 3.3 | 3.726838 | 5.042856 |  | 0 |
| 109 | 0.81 | 2.27 | 3.87 | 2.6 | 3.7 | 7.031872 | 9.402916 |  | 1 |
| 111 | 1.01 | 1.7  | 4.45 | 1.5 | 2.8 | 1.045943 | 4.667938 |  | 0 |
| 112 | 1.4  | 1.79 | 3.51 | 1.4 | 3.2 | 0.981783 | 2.471405 |  | 0 |
| 113 | 1.11 | 2.39 | 3.76 | 2.3 | 3.6 | 1.94958  | 3.717195 |  | 0 |
| 114 | 1.17 | 2.26 | 3.18 | 2.5 | 4.7 | 4.605931 | 6.302436 |  | 1 |
| 115 | 1.47 | 1.67 | 4.81 | 1.9 | 5.3 | 3.455847 | 5.595555 |  | 1 |
| 116 | 0.61 | 2.77 | 2.69 | 2.6 | 4.5 | 2.553488 | 4.921034 |  | 0 |
| 117 | 0.76 | 2.95 | 4.81 | 2.4 | 4.1 | 3.966705 | 7.659328 |  | 1 |
| 119 | 0.55 | 1.75 | 2.73 | 1.6 | 4.3 | 5.163102 | 7.719116 |  | 1 |
| 120 | 1.43 | 1.74 | 3.74 | 1.6 | 4.9 | 3.122215 | 5.637169 |  | 0 |
| 121 | 3.33 | 1.35 | 3.61 | 4.2 | 2.7 | 4.092224 | 6.095578 |  | 0 |
| 122 | 1.3  | 2.11 | 3.15 | 1.2 | 2.6 |          |          |  | 1 |
| 124 | 0.7  | 2.07 | 3.39 | 2.5 | 4.8 | 9.849065 | 6.561817 |  | 0 |

gen\_cnv

|     |      |      |      |     |     |          |          |   |
|-----|------|------|------|-----|-----|----------|----------|---|
| 125 | 1.04 | 2.54 | 4.08 | 3.1 | 5.5 | 4.837528 | 8.161678 | 1 |
| 126 | 0.83 | 1.75 | 3.54 | 2.2 | 2.5 | 2.2735   | 5.512665 | 0 |
| 127 | 0.58 | 2.59 | 2.9  | 1.6 | 3.3 | 4.741489 | 6.837016 | 1 |
| 128 | 0.44 | 2.38 | 3.75 | 1.8 | 2.9 | 3.020791 | 4.119834 | 0 |
| 129 | 0.87 | 2.84 | 4.32 | 2   | 3   | 2.264605 | 3.619065 | 0 |
| 130 | 1.16 | 3.04 | 3.91 | 2.4 | 3.7 | 3.930536 | 7.445358 | 1 |
| 131 | 0.69 | 2.35 | 2.63 | 2.6 | 2.6 | 4.117385 | 4.252823 | 0 |
| 135 | 1    | 2.05 | 4.6  | 1.3 | 2.3 | 4.221531 | 6.585167 | 1 |
| 136 | 0.97 | 1.84 | 3.78 | 2.3 | 4.2 | 3.267241 | 6.786363 | 0 |
| 137 | 0.68 | 1.73 | 2.24 | 1.3 | 3   | 1.300085 | 3.143399 | 0 |
| 138 | 2.04 | 1.92 | 4.03 | 0.9 | 1.8 | 1.331869 | 3.389915 | 0 |
| 139 | 0.66 | 1.99 | 2.77 | 1.4 | 2   | 4.180597 | 7.594673 | 1 |
| 140 | 1.2  | 1.52 | 4.17 | 1.2 | 2.4 | 3.055766 | 6.310398 | 1 |
| 141 | 1.75 | 1.39 | 4.06 | 1.2 | 1.6 | 3.632777 | 9.057903 | 1 |
| 142 | 0.52 | 2.4  | 3.18 | 2.3 | 3.1 | 6.056926 | 9.849065 | 1 |
| 144 | 0.38 | 2.52 | 2.24 | 7.5 | 5.7 | 2.72658  | 5.892215 | 0 |
| 147 | 2.17 | 1.32 | 3.16 | 1.6 | 3.2 |          |          | 0 |
| 148 | 1.16 | 1.96 | 4.03 | 2.5 | 4.1 | 3.716355 | 6.496948 | 1 |
| 149 | 0.61 | 2.23 | 4.01 | 4.4 | 4.5 | 4.219377 | 7.348724 | 1 |
| 150 | 0.82 | 2.83 | 3.96 | 1.7 | 3   | 2.076    | 4.384    | 1 |
| 151 | 0.78 | 1.29 | 5.02 | 2   | 3.1 |          |          | 0 |
| 152 | 0.92 | 1.88 | 2.96 | 1.4 | 2.8 | 1.553602 | 2.690087 | 0 |
| 154 | 0.5  | 2.42 | 2.84 | 1.3 | 3.2 | 2.45839  | 4.574859 | 1 |
| 155 | 0.95 | 2.12 | 4.68 | 1.3 | 3.9 | 1.132473 | 3.269861 | 0 |
| 157 | 1.01 | 2.66 | 2.74 | 3.5 | 5.3 | 3.93864  | 3.755525 | 1 |
| 158 | 0.67 | 2.87 | 3.61 | 2   | 4.1 | 1.788482 | 5.34518  | 0 |
| 159 | 2.31 | 1.51 | 4.77 | 1.1 | 2.4 | 4.665952 | 4.187134 | 1 |
| 161 | 0.56 | 1.66 | 4.54 | 2.1 | 3.1 | 3.909243 | 5.771335 | 1 |
| 162 | 0.68 | 2.2  | 5.7  | 1.7 | 2.3 | 4.884171 | 8.294449 | 1 |
| 164 | 0.74 | 1.23 | 2.64 | 1.3 | 3.5 | 1.600105 | 3.354991 | 0 |
| 165 | 2.97 | 1.36 | 5.05 | 1.2 | 1.8 |          |          | 0 |
| 166 | 0.57 | 2.11 | 3.19 | 1.4 | 3.4 | 1        | 5.6      | 1 |
| 167 | 0.75 | 3.3  | 3.99 | 2.5 | 4   | 2.070175 | 4.49255  | 0 |
| 168 | 0.84 | 2.75 | 3.74 | 1.6 | 4.6 | 3.589118 | 6.534607 | 1 |
| 169 | 1.64 | 2.16 | 4.21 | 2   | 1.8 |          |          | 0 |
| 170 | 0.47 | 1.63 | 3.34 | 1.5 | 3.4 | 3.3      | 4.039102 | 1 |
| 171 | 0.77 | 1.53 | 4.37 | 2.4 | 4.5 | 4.1      | 6.384838 | 1 |
| 172 | 0.51 | 1.9  | 3.87 | 1.2 | 3.2 | 1.990807 | 2.547834 | 0 |
| 173 | 1.12 | 2.21 | 3.86 | 1.3 | 2.9 | 3        | 4.255822 | 1 |
| 174 | 0.82 | 1.53 | 4.23 | 1   | 2   | 1.1      | 3.027996 | 0 |
| 175 | 0.8  | 2.31 | 3.03 | 0.9 | 1.9 | 1.886706 | 3.945312 | 0 |
| 176 | 0.64 | 2.1  | 3.02 | 2.4 | 3.6 | 3.058596 | 5.733482 | 1 |
| 177 | 0.77 | 2.48 | 3.16 | 1.1 | 2.2 | 1.548662 | 2.309972 | 0 |
| 178 | 0.89 | 2.05 | 5.59 | 2.3 | 3.7 | 2.229498 | 2.493033 | 0 |
| 179 | 2.46 | 1.19 | 6.01 | 0.9 | 1.5 | 3.258743 | 3.877809 | 1 |
| 180 | 1.2  | 1.27 | 2.7  | 1.3 | 3.2 | 4.422603 | 3.084115 | 1 |
| 181 | 0.73 | 1.42 | 3.04 | 2.9 | 4.6 | 2.760786 | 5.195857 | 0 |
| 182 | 0.41 | 2.48 | 3.7  | 1.8 | 3.4 | 4.211284 | 5.645922 | 1 |
| 183 | 1.86 | 2.23 | 2.97 | 1.5 | 2.9 | 2.243692 | 4.735959 | 0 |
| 186 | 1.74 | 1.52 | 3.26 | 1.7 | 3.8 | 1.558944 | 5.069195 | 0 |
| 187 | 1.08 | 1.8  | 3.28 | 1.9 | 3.2 | 2.067985 | 4.107585 | 0 |
| 188 | 0.57 | 2.54 | 2.67 | 2.2 | 4.1 |          |          | 1 |

## gen\_cnv

|     |      |      |      |     |     |          |          |   |
|-----|------|------|------|-----|-----|----------|----------|---|
| 189 | 3.37 | 1.3  | 4.21 | 1   | 2.7 | 2.03603  | 4.721446 | 1 |
| 191 | 1.41 | 1.04 | 3.21 | 2   | 4.9 | 2.061463 | 5.760277 | 0 |
| 192 | 1.03 | 1.72 | 4.83 | 2.6 | 4.7 | 3.001654 | 5.643155 | 1 |
| 194 | 2.46 | 1.93 | 4.99 | 1.7 | 4.5 | 2.048851 | 5.427779 | 1 |
| 195 | 1.21 | 1.45 | 4.38 | 1.3 | 3.8 | 0.913669 | 1.921411 | 0 |
| 197 | 0.98 | 1.7  | 3.54 | 2.7 | 5.3 |          |          | 1 |
| 198 | 1    | 1.42 | 2.43 | 1.6 | 3.4 | 2.147782 | 6.218123 | 1 |
| 199 | 1.39 | 1.34 | 4.71 | 4.1 | 6.2 | 2.792574 | 6.921837 | 0 |
| 202 | 0.75 | 1.55 | 3.62 | 3   | 5   | 1.813125 | 4.928089 | 0 |
| 203 | 1.76 | 1.47 | 4.51 | 2.8 | 4.7 | 4.517489 | 7.548802 | 1 |
| 204 | 0.74 | 2.75 | 3.25 | 2.5 | 3.5 | 1.207386 | 2.970074 | 0 |
| 205 | 1.03 | 1.67 | 5.11 | 2.2 | 5.4 | 5.996123 | 8.191805 | 1 |
| 206 | 0.87 | 1.7  | 3.26 | 1.9 | 3.8 | 3.299185 | 5.08243  | 0 |
| 208 | 0.81 | 2.94 | 3.83 | 2.6 | 4.8 | 6.668353 | 8.50535  | 1 |
| 209 | 1.11 | 1.84 | 3.45 | 1.4 | 3.7 | 6.102402 | 9.593817 | 1 |
| 211 | 0.77 | 3    | 3.44 | 2.8 | 4.1 | 2.239434 | 5.024737 | 0 |
| 212 | 1.05 | 2.02 | 3.42 | 2.8 | 4   | 4.092375 | 6.850353 | 0 |
| 213 | 0.93 | 2.07 | 3.38 | 2.8 | 4.8 | 4.264644 | 8.168009 | 1 |
| 214 | 1.43 | 1.48 | 5.63 | 1.9 | 3.6 | 3.079958 | 5.103631 | 0 |
| 215 | 0.37 | 2.04 | 2.13 | 1.3 | 2.7 |          |          | 0 |
| 216 | 0.93 | 2.16 | 2.53 | 2   | 3.2 | 6.619078 | 8.479341 | 1 |
| 217 | 0.75 | 1.65 | 5.51 | 2   | 3.8 | 5.055323 | 7.430832 | 1 |
| 218 | 1.43 | 1.07 | 3.92 | 2.8 | 3.7 | 1.877597 | 3.754459 | 0 |
| 219 | 1.47 | 2.12 | 3.73 | 1.8 | 4.2 | 1.807801 | 3.962786 | 0 |
| 220 | 2.48 | 1.33 | 3.12 | 1.4 | 3.5 | 3.725796 | 7.211279 | 1 |
| 221 | 1.12 | 2.1  | 3.73 | 2.2 | 3.6 | 2.011442 | 4.762053 | 0 |
| 222 | 1.17 | 1.4  | 2.83 | 2.7 | 4.4 | 2.037956 | 4.419339 | 0 |
| 223 | 2.03 | 1.5  | 5.74 | 4   | 4.4 | 4.28423  | 7.771658 | 1 |
| 224 | 0.93 | 1.23 | 3.57 | 0.9 | 1.8 | 3.795556 | 6.371164 | 1 |
| 225 | 1.63 | 0.93 | 2.77 | 1.9 | 4.1 | 3.019024 | 6.421571 | 0 |
| 226 | 0.9  | 1.75 | 2.86 | 2.7 | 5.2 |          |          | 1 |
| 228 | 0.96 | 1.53 | 2.91 | 1.1 | 2.6 | 5.355731 | 8.058122 | 1 |
| 230 | 0.79 | 1.1  | 2.16 | 1.9 | 3.5 | 4.557503 | 4.073538 | 1 |
| 231 | 1.22 | 1.54 | 4.13 | 2.2 | 3   | 3.759339 | 7.105125 | 1 |
| 232 | 0.74 | 1.82 | 3.45 | 1.6 | 2.7 | 1.999846 | 3.686332 | 0 |
| 233 | 1.32 | 1.48 | 3.07 | 1.7 | 3.5 | 2.007401 | 3.746928 | 0 |
| 234 | 0.45 | 2.2  | 2.44 | 4.8 | 5.1 | 2.207459 | 4.958004 | 0 |
| 235 | 0.97 | 1.33 | 4.5  | 1.4 | 3.1 |          |          | 1 |
| 236 | 1.75 | 1.46 | 3.02 | 1.2 | 2.3 | 3.23428  | 4.270439 | 1 |
| 237 | 0.45 | 1.92 | 2.22 | 2.4 | 3.2 | 3.63545  | 7.50805  | 1 |
| 238 | 1.69 | 1.14 | 4.5  | 1.9 | 4.1 | 2.332542 | 4.633711 | 1 |
| 240 | 1.46 | 1.85 | 3.09 | 1.3 | 3.5 | 2.603176 | 3.960212 | 0 |
| 241 | 1.15 | 1.12 | 3.2  | 2.4 | 4.4 | 4.358265 | 7.835499 | 1 |
| 242 | 1.27 | 1.92 | 5.06 | 1.4 | 4   | 4.683227 | 7.205324 | 1 |
| 243 | 0.71 | 1.79 | 2.58 | 1.1 | 3.5 | 2.186306 | 4.080445 | 0 |
| 244 | 2.83 | 0.61 | 2.43 | 0.7 | 3   | 0.968546 | 2.788925 | 0 |
| 245 | 0.68 | 2.31 | 2.76 | 1.8 | 1.5 | 4.680441 | 6.694954 | 1 |
| 246 | 2.45 | 0.89 | 4.22 | 1.1 | 2.8 | 1.911505 | 3.890964 | 0 |
| 247 | 0.8  | 3.07 | 2.64 | 0.8 | 2.3 | 3.858001 | 6.686338 | 1 |
| 248 | 1.1  | 1.62 | 2.59 | 0.9 | 3.1 |          |          | 0 |
| 249 | 0.88 | 2.11 | 3.88 | 1.6 | 4.3 | 5.583308 | 8.155124 | 1 |
| 251 | 0.77 | 2.09 | 3.04 | 2.2 | 5.4 | 5.787471 | 7.344405 | 1 |

gen\_cnv

|     |      |      |      |     |     |          |          |   |
|-----|------|------|------|-----|-----|----------|----------|---|
| 252 | 0.87 | 2.08 | 3.16 | 2   | 5.1 |          |          | 0 |
| 253 | 0.79 | 1.72 | 3.61 | 1.7 | 3.8 | 1.877792 | 3.38186  | 0 |
| 254 | 0.5  | 1.55 | 2.94 | 2.1 | 3.4 | 3.258056 | 5.715088 | 1 |
| 255 | 0.51 | 1.53 | 2.41 | 1.9 | 3.6 | 3.131457 | 5.719103 | 1 |
| 256 | 1.68 | 1.45 | 4.66 | 1.5 | 3.2 | 1.478442 | 3.412556 | 0 |
| 258 | 0.64 | 1.58 | 1.96 | 2.4 | 4.5 | 1.186809 | 3.591393 | 0 |
| 259 | 0.94 | 2    | 3.19 | 1.7 | 3   | 3.313398 | 7.733983 | 1 |
| 260 | 0.75 | 1.35 | 3.25 | 1.6 | 3   | 3.219153 | 6.29029  | 1 |
| 261 | 1.52 | 1.79 | 3.35 | 2.1 | 3.4 | 2.408544 | 4.552407 | 0 |
| 262 | 0.87 | 1.92 | 2.3  | 2.1 | 2   | 2.054125 | 4.720343 | 1 |
| 263 | 0.51 | 2.08 | 4.23 | 1.6 | 3   | 1.576726 | 4.146319 | 0 |
| 265 | 0.67 | 1.63 | 3.88 | 1.1 | 3.3 | 1.532508 | 3.622754 | 0 |
| 266 | 1.45 | 1.28 | 4.96 | 1.3 | 2.9 | 2.309691 | 5.041803 | 1 |
| 267 | 1.07 | 2.35 | 3.59 | 1.5 | 2.8 | 2.156165 | 3.785621 | 0 |
| 268 | 0.61 | 2.31 | 4.43 | 2.2 | 3.5 | 4.349461 | 4.842225 | 1 |
| 269 | 1.15 | 1.78 | 4.31 | 1.1 | 2.5 | 2.397416 | 5.069003 | 0 |
| 270 | 0.4  | 2.05 | 2.45 | 2.2 | 2.9 | 4.566194 | 7.375637 | 1 |
| 272 | 2.91 | 1.09 | 3.03 | 2   | 3.9 | 3.313638 | 6.450326 | 1 |
| 273 | 0.76 | 2    | 1.72 | 0.9 | 5.6 | 4.784059 | 7.005378 | 1 |
| 275 | 1.41 | 1.69 | 4.9  | 1.8 | 5.1 | 2.209694 | 5.785479 | 0 |
| 276 | 1.86 | 1.28 | 3.21 | 1.4 | 3.7 | 3.536233 | 7.117577 | 1 |
| 277 | 0.86 | 1.66 | 4.22 | 1.8 | 3.8 | 3.134375 | 6.45729  | 1 |
| 278 | 1.82 | 1.11 | 3.35 | 0.9 | 2.6 | 1.32689  | 2.775811 | 0 |
| 279 | 0.6  | 2.51 | 4.32 | 1.2 | 2.7 | 2.850083 | 4.238237 | 0 |
| 280 | 0.7  | 1.68 | 3.78 | 1.8 | 2.7 | 3.354771 | 6.63583  | 1 |
| 281 | 1.87 | 1.59 | 3.86 | 1.4 | 2.8 | 3.956372 | 6.329966 | 1 |
| 282 | 0.81 | 1.06 | 3.7  | 2.2 | 5   | 3.941505 | 7.048404 | 1 |
| 283 | 1.01 | 1.61 | 3.26 | 0.7 | 2.5 | 1.541611 | 3.507581 | 0 |
| 284 | 1.12 | 1.94 | 3.8  | 3.7 | 5.8 | 3.992354 | 5.626809 | 0 |
| 285 | 1.54 | 1.66 | 2.89 | 1.7 | 3.3 | 1.750423 | 4.265649 | 0 |
| 286 | 0.59 | 1.85 | 2.1  | 2   | 3.9 | 4.565714 | 7.202367 | 1 |
| 288 | 0.55 | 2.32 | 3.64 | 2.8 | 5.2 | 4.097925 | 7.924357 | 1 |
| 289 | 0.95 | 2.4  | 4.93 | 1.7 | 3.5 | 3.396052 | 4.444742 | 0 |
| 290 | 0.92 | 1.55 | 5.09 | 2.4 | 4   | 3.946723 | 6.050887 | 1 |
| 292 | 0.96 | 1.91 | 5.02 | 1.6 | 3.6 | 3.737733 | 5.116666 | 0 |
| 293 | 0.99 | 1.69 | 2.87 | 3   | 4.9 | 2.951058 | 3.433535 | 1 |
| 294 | 1.56 | 1.92 | 3.77 | 1.4 | 2.5 | 2.8468   | 5.202558 | 0 |
| 295 | 1.04 | 2.55 | 3.3  | 1.3 | 2.2 | 3.95289  | 6.290258 | 1 |
| 296 | 0.87 | 2.12 | 2.77 | 3.9 | 4.4 | 2.179975 | 5.40164  | 0 |
| 297 | 1.18 | 2.34 | 2.31 | 1   | 2.1 | 2.160989 | 3.199134 | 0 |
| 298 | 3.51 | 0.85 | 3.97 | 1   | 2.6 | 1.693159 | 3.557003 | 0 |
| 299 | 1.63 | 1.65 | 4.2  | 1.2 | 3.1 | 3.092519 | 6.3025   | 1 |
| 300 | 0.93 | 2.73 | 1.74 | 1.5 | 3.6 | 5.386479 | 6.051012 | 1 |

## gen\_cnv

| sexe   | age | Date_cnv   | date_fin   | CFH | ARMS2 | TABAC | cnv | BMI        |
|--------|-----|------------|------------|-----|-------|-------|-----|------------|
| Female | 83  |            | 12/14/2006 | CC  | GG    |       | 0   | 0 23.73324 |
| Female | 80  | 1/4/2006   | 1/4/2006   | CT  | TT    |       | 0   | 1 20.07733 |
| Female | 74  |            | 12/21/2006 | CC  | TT    |       | 0   | 0 23.53037 |
| Male   | 71  | 6/6/2006   | 6/6/2006   | CT  | TT    |       | 1   | 1 24.7721  |
| Male   | 82  | 1/20/2005  | 1/20/2005  | CC  | GT    |       | 0   | 1 20.43817 |
| Female | 79  | 11/3/2005  | 11/3/2005  | TT  | TT    |       | 0   | 1 24.65483 |
| Female | 65  |            | 1/18/2007  | CC  | GT    |       | 0   | 0 21.2585  |
| Male   | 72  |            | 1/31/2007  | CT  | TT    |       | 1   | 0 23.38435 |
| Female | 80  |            | 1/31/2007  | CT  | GT    |       | 0   | 0 31.63458 |
| Male   | 78  |            | 1/31/2007  | CC  | GG    |       | 1   | 0 24.21229 |
| Female | 78  |            | 2/28/2007  | CC  | GT    |       | 0   | 0 26.33289 |
| Female | 74  |            | 1/18/2007  | CT  | TT    |       | 1   | 0 32.28306 |
| Male   | 81  |            | 1/23/2007  | CT  | GG    |       | 1   | 0 23.12467 |
| Female | 66  |            | 1/18/2007  | CT  | GT    |       | 0   | 0 29.29688 |
| Male   | 72  | 9/21/2005  | 9/21/2005  | CC  | TT    |       | 1   | 1 20.76125 |
| Female | 77  | 10/10/2005 | 10/10/2005 | TT  | GT    |       | 0   | 1 27.4406  |
| Female | 74  |            | 2/21/2007  | TT  | TT    |       | 1   | 0 20.66116 |
| Female | 76  | 1/23/2007  | 1/23/2007  | CC  | TT    |       | 0   | 1 26.82742 |
| Female | 76  |            | 2/28/2007  | CT  | GT    |       | 0   | 0 23.11111 |
| Female | 84  |            | 2/21/2007  | CT  | GG    |       | 0   | 0 26.98962 |
| Female | 83  |            | 3/21/2007  | CT  | GG    |       | 0   | 0          |
| Female | 77  | 1/10/2005  | 1/10/2005  | TT  | GT    |       | 1   | 1 24.69136 |
| Male   | 79  |            | 2/28/2007  | CT  | GT    |       | 1   | 0 20.93664 |
| Male   | 67  |            | 2/22/2007  | TT  | TT    |       | 0   | 0 25.39063 |
| Male   | 67  | 11/15/2004 | 11/15/2004 | CC  | TT    |       | 1   | 1 25.39063 |
| Female | 72  |            | 3/28/2007  | TT  | GT    |       | 0   | 0 21.10727 |
| Female | 78  |            | 3/7/2007   | TT  | GT    |       | 0   | 0 19.11111 |
| Male   | 63  | 10/14/2005 | 10/14/2005 | CC  | GG    |       | 1   | 1 21.71925 |
| Female | 69  | 12/8/2005  | 12/8/2005  | TT  | TT    |       | 0   | 1 20.93664 |
| Male   | 76  |            | 3/13/2007  | CT  | GG    |       | 1   | 0 29.3724  |
| Female | 65  | 6/25/2004  | 6/25/2004  | CC  | GT    |       | 0   | 1 25.40282 |
| Female | 81  |            | 3/13/2007  | CT  | GT    |       | 0   | 0 22.09317 |
| Female | 73  |            | 3/8/2007   | TT  | GG    |       | 0   | 0 32.87197 |
| Female | 71  |            | 3/8/2007   | TT  | GT    |       | 0   | 0 23.66144 |
| Female | 72  | 9/27/2004  | 9/27/2004  | CC  | TT    |       | 0   | 1 48.2435  |
| Male   | 68  | 1/15/2007  | 1/15/2007  | TT  | TT    |       | 1   | 1 30.48316 |
| Male   | 68  | 6/21/2005  | 6/21/2005  | CC  | GT    |       | 1   | 1 23.14726 |
| Male   | 83  |            | 3/15/2007  | TT  | GG    |       | 1   | 0 20.70082 |
| Female | 66  |            | 3/8/2007   | TT  | TT    |       | 1   | 0 28.66889 |
| Female | 66  |            | 3/21/2007  | CC  | GT    |       | 0   | 0 21.45357 |
| Female | 81  | 2/22/2007  | 2/22/2007  | TT  | GT    |       | 1   | 1 26.07897 |
| Male   | 63  |            | 3/22/2007  | CC  | GT    |       | 1   | 0 22.02432 |
| Male   | 78  | 4/18/2007  | 4/18/2007  | TT  | GT    |       | 0   | 1 28.40816 |
| Female | 74  | 3/29/2005  | 3/29/2005  | CT  | GT    |       | 1   | 1 26.06168 |
| Female | 68  |            | 4/18/2007  | CT  | GG    |       | 0   | 0 19.14063 |
| Female | 71  |            | 3/21/2007  | CT  | TT    |       | 0   | 0 21.79931 |
| Female | 76  |            | 4/19/2007  | CT  | GG    |       | 0   | 0 22.38631 |
| Male   | 71  |            | 4/25/2007  | CT  | GT    |       | 1   | 0 23.49524 |
| Female | 67  | 3/15/2005  | 3/15/2005  | CC  | GT    |       | 1   | 1 23.62445 |
| Female | 80  | 4/5/2007   | 4/5/2007   | CT  | GG    |       | 0   | 0 23.72529 |
| Male   | 77  |            | 3/28/2007  | CT  | GT    |       | 1   | 0 26.29849 |

## gen\_cnv

|        |    |           |            |    |    |   |   |          |
|--------|----|-----------|------------|----|----|---|---|----------|
| Female | 73 | 9/24/2004 | 9/24/2004  | CC | GT | 1 | 1 | 25.63117 |
| Female | 61 |           | 3/28/2007  | TT | TT | 0 | 0 | 30.46875 |
| Male   | 78 |           | 3/29/2007  | CT | GG | 1 | 0 | 28       |
| Male   | 71 |           | 6/11/2007  | CC | TT | 1 | 0 | 20.44674 |
| Male   | 77 |           | 3/29/2007  | CT | GT | 1 | 0 | 23.93899 |
| Male   | 75 |           | 4/18/2007  | TT | GT | 0 | 0 | 33.59375 |
| Female | 60 | 10/4/2005 | 10/4/2005  | CC | GT | 0 | 1 | 25.23634 |
| Female | 58 |           | 4/19/2007  | CC | TT | 1 | 0 | 25.12783 |
| Female | 72 |           | 4/5/2007   | CC | GG | 0 | 0 | 26.3958  |
| Female | 75 | 9/20/2005 | 9/20/2005  | TT | GT | 0 | 1 | 22.14533 |
| Male   | 67 |           | 4/19/2007  | CT | GT | 1 | 0 | 26.66667 |
| Female | 82 |           | 4/25/2007  | TT | GG | 0 | 0 | 28.84153 |
| Male   | 77 |           | 5/3/2007   | TT | GT | 1 | 0 | 25       |
| Male   | 65 | 9/6/2005  | 9/6/2005   | CT | GT | 1 | 1 | 27.23922 |
| Female | 67 |           | 5/24/2007  | CC | GG | 1 | 0 | 22.65625 |
| Male   | 76 |           | 5/3/2007   | CT | GG | 0 | 0 | 26.81359 |
| Female | 63 | 8/10/2006 | 8/10/2006  | CC | GG | 0 | 1 | 24.80159 |
| Male   | 72 |           | 5/24/2007  | CC | GG | 1 | 0 | 22.86237 |
| Male   | 81 | 5/24/2007 | 5/24/2007  | CT | GG | 1 | 1 | 20.91071 |
| Female | 78 |           | 6/7/2007   | CT | TT | 0 | 0 | 31.2213  |
| Female | 56 |           | 6/7/2007   | CT | TT | 0 | 0 | 20.77562 |
| Male   | 75 |           | 6/7/2007   | CT | GT | 0 | 0 | 25.47666 |
| Female | 69 |           | 5/22/2007  | CT | GT | 0 | 0 | 23.87511 |
| Male   | 77 |           | 6/21/2007  | TT | GT | 0 | 0 | 24.38653 |
| Male   | 71 |           | 6/21/2007  | CC | GT | 1 | 0 | 27.43484 |
| Female | 78 |           | 8/16/2007  | CC | GT | 1 | 0 | 22.50693 |
| Female | 80 |           | 7/3/2007   | CT | GT | 0 | 0 | 28.73175 |
| Female | 80 |           | 6/4/2007   | TT | TT | 1 | 0 | 23.11111 |
| Female | 78 |           | 3/24/2005  | CT | GT | 1 | 0 | 22.53086 |
| Female | 75 |           | 6/7/2007   | TT | GT | 0 | 0 | 25.97012 |
| Female | 77 | 9/19/2006 | 9/19/2006  | CT | GG | 0 | 1 | 22.30815 |
| Female | 72 | 6/20/2006 | 6/20/2006  | CT | GG | 0 | 1 | 27.1809  |
| Female | 64 |           | 8/23/2007  | CT | TT | 0 | 0 | 19.14063 |
| Male   | 60 |           | 8/23/2007  | TT | GG | 1 | 0 | 25.01352 |
| Female | 79 |           | 8/30/2007  | TT | GG |   | 0 | 24.78426 |
| Female | 82 |           | 9/6/2007   | CT | TT | 0 | 0 | 41.41519 |
| Female | 76 |           | 9/6/2007   | CT | GG | 1 | 0 | 29.96433 |
| Female | 72 |           | 9/6/2007   | CT | GG | 0 | 0 | 27.33564 |
| Male   | 68 |           | 10/2/2007  | CT | GT | 1 | 0 | 25.5102  |
| Female | 77 |           | 10/4/2007  | CC | GT | 0 | 0 | 22.05805 |
| Male   | 60 |           | 11/27/2007 | CT | GG | 0 | 0 | 28.73175 |
| Female | 73 |           | 10/4/2007  | TT | GT | 0 | 0 | 25       |
| Male   | 72 |           | 10/15/2007 | TT | GT | 0 | 0 | 30.42185 |
| Female | 69 |           | 10/8/2007  | CC | GT | 0 | 0 | 24.81633 |
| Female | 74 |           | 10/8/2007  | TT | GT | 0 | 0 | 23.73866 |
| Male   | 69 |           | 10/8/2007  | CT | GT | 1 | 0 | 19.53125 |
| Female | 75 |           | 11/5/2007  | CT | TT | 0 | 0 | 21.50189 |
| Male   | 80 |           | 10/15/2007 | CC | TT | 1 | 0 | 23.5102  |
| Female | 56 |           | 9/27/2007  | CT | GG | 0 | 0 | 24.85907 |
| Female | 83 |           | 10/15/2007 | CC | GT | 0 | 0 | 25.60554 |
| Female | 79 |           | 4/21/2005  | CC | TT | 1 | 0 | 26.79494 |
| Female | 60 |           | 10/22/2007 | CC | GG | 0 | 0 | 22.49135 |

## gen\_cnv

|        |    |            |            |    |    |   |   |          |
|--------|----|------------|------------|----|----|---|---|----------|
| Female | 69 |            | 10/15/2007 | CC | TT | 0 | 0 | 29.29688 |
| Male   | 82 | 11/7/2006  | 11/7/2006  | TT | TT | 1 | 1 | 24.22145 |
| Female | 79 | 9/11/2006  | 9/11/2006  | CT | GT | 0 | 1 | 34.15978 |
| Female | 67 |            | 11/5/2007  | TT | TT | 0 | 0 | 35.55556 |
| Female | 65 |            | 11/5/2007  | TT | GT | 1 | 0 | 27.04164 |
| Female | 80 |            | 11/20/2007 | CC | TT | 0 | 1 | 24.80159 |
| Male   | 76 |            | 11/27/2007 | CC | GT | 1 | 0 | 26.29758 |
| Female | 81 | 4/27/2005  | 4/27/2005  | CC | GT | 0 | 1 | 28       |
| Female | 75 |            | 11/27/2007 | CC | GT | 1 | 0 | 27.68878 |
| Male   | 75 |            | 11/27/2007 | CC | GT | 1 | 0 | 24.38653 |
| Female | 73 |            | 11/5/2007  | CT | GT | 1 | 0 | 24.97399 |
| Female | 77 | 11/14/2005 | 11/14/2005 | CT | GT | 0 | 1 | 22.26563 |
| Male   | 82 | 8/22/2007  | 8/22/2007  | CT | GT | 1 | 1 | 25.80645 |
| Female | 84 |            | 12/4/2007  | TT | GT | 0 | 0 | 22.59814 |
| Female | 80 |            | 12/4/2007  | CT | GT | 1 | 0 | 26.89767 |
| Female | 72 |            | 12/4/2007  | CT | GG | 0 | 0 | 24.4646  |
| Female | 83 |            | 6/7/2005   | CT | GT | 0 | 0 | 22.65625 |
| Female | 69 | 5/29/2007  | 5/29/2007  | CT | GT | 0 | 1 | 23.62445 |
| Male   | 76 |            | 12/10/2007 | CT | GG | 0 | 0 | 24.22145 |
| Female | 79 | 10/3/2006  | 10/3/2006  | CC | GG | 0 | 1 | 24.44444 |
| Female | 70 | 3/8/2005   | 3/8/2005   | CT | GT | 1 | 1 | 20.3125  |
| Female | 65 |            | 12/10/2007 | CC | GT | 1 | 0 | 26.12245 |
| Female | 72 |            | 12/10/2007 | CT | GG | 1 | 0 | 24.44444 |
| Female | 82 |            | 12/10/2007 | TT | TT | 0 | 0 | 33.21799 |
| Female | 72 |            | 1/7/2008   | CT | GT | 0 | 0 | 23.30668 |
| Male   | 79 |            | 12/10/2007 | CT | GT | 1 | 0 | 29.0688  |
| Male   | 78 |            | 1/7/2008   | CT | GT | 1 | 0 | 34.96358 |
| Female | 63 |            | 1/17/2008  | CT | GT | 0 | 0 | 24.73246 |
| Male   | 73 |            | 1/17/2008  | CT | GT | 1 | 0 | 23.52941 |
| Male   | 75 |            | 1/21/2008  | CT | TT | 1 | 0 | 28.30385 |
| Female | 80 |            | 7/5/2005   | CT | GG | 0 | 0 | 26.72993 |
| Female | 76 |            | 1/21/2008  | CT | GG | 0 | 0 | 28.3737  |
| Female | 81 | 1/23/2007  | 1/23/2007  | CT | GT | 0 | 1 | 23.11111 |
| Female | 82 |            | 1/24/2008  | CT | GT | 0 | 0 | 27.68878 |
| Female | 71 |            | 1/25/2005  | CC | TT | 0 | 0 | 36.88889 |
| Male   | 73 |            | 1/21/2008  | CT | GT | 1 | 0 | 24.7721  |
| Female | 68 |            | 1/17/2008  | CC | TT | 0 | 0 | 28.40816 |
| Female | 84 | 12/4/2007  | 12/4/2007  | CC | GT | 1 | 1 | 23.87511 |
| Female | 83 |            | 1/21/2008  | TT | TT | 0 | 0 | 23.42209 |
| Male   | 63 |            | 1/17/2008  | TT | GT | 1 | 0 | 28.34186 |
| Female | 72 | 2/11/2008  | 2/11/2008  | TT | TT | 0 | 1 | 24.14152 |
| Male   | 77 |            | 2/4/2008   | CC | GT | 1 | 0 | 27.5802  |
| Female | 71 | 6/29/2007  | 6/29/2007  | CT | GG | 1 | 1 | 25.34435 |
| Female | 55 | 4/28/2007  | 4/28/2007  | CT | TT | 0 | 1 | 27.40766 |
| Female | 76 |            | 2/4/2008   | CC | GT | 1 | 0 | 21.96712 |
| Female | 78 | 2/6/2007   | 2/6/2007   | CT | GT | 0 | 1 | 26.25958 |
| Male   | 68 |            | 2/11/2008  | CC | GT | 1 | 0 | 23.50781 |
| Female | 76 |            | 1/28/2008  | CC | GG | 0 | 0 | 31.88776 |
| Male   | 73 |            | 2/11/2008  | CT | TT | 1 | 0 | 23.23346 |
| Male   | 82 |            | 2/11/2008  | TT | GT | 0 | 0 | 25.39022 |
| Female | 80 |            | 2/25/2008  | CC | GG | 0 | 0 | 34.8944  |
| Female | 71 | 9/14/2005  | 9/14/2005  | CT | TT | 0 | 1 | 28.44095 |



## gen\_cnv

|        |    |            |            |    |    |   |   |          |
|--------|----|------------|------------|----|----|---|---|----------|
| Female | 73 | 1/28/2008  | 1/28/2008  | CT | TT | 0 | 1 | 20.44914 |
| Female | 77 |            | 2/11/2008  | CC | GG | 0 | 0 | 24.91349 |
| Female | 68 |            | 1/28/2008  | CC | GT | 1 | 0 | 27.77427 |
| Male   | 66 | 11/20/2006 | 11/20/2006 | CT | TT | 1 | 1 | 24.30462 |
| Female | 76 | 5/15/2007  | 5/15/2007  | CT | TT | 0 | 1 | 22.60026 |
| Female | 68 | 1/3/2006   | 1/3/2006   | CT | GT | 1 | 1 | 25.72103 |
| Male   | 80 | 11/17/2005 | 11/17/2005 | CC | GG | 1 | 1 | 24.62296 |
| Male   | 73 | 10/18/2005 | 10/18/2005 | CT | TT | 0 | 1 | 24.00549 |
| Female | 71 |            | 3/10/2008  | CT | GG | 0 | 0 | 22.60026 |
| Male   | 73 |            | 3/10/2008  | CT | GT | 1 | 0 | 26.63892 |
| Female | 77 |            | 2/25/2008  | CC | GT | 0 | 0 | 25.46939 |
| Female | 75 | 11/19/2007 | 11/19/2007 | TT | GT | 0 | 1 | 25.28011 |
| Male   | 76 |            | 3/10/2008  | TT | TT | 0 | 0 | 32.28306 |
| Female | 78 |            | 3/31/2008  | CT | GT | 1 | 1 | 26.5625  |
| Female | 67 |            | 3/10/2008  | CT | GG | 0 | 0 | 21.96712 |
| Female | 74 |            | 3/31/2008  | CT | GT | 0 | 0 | 23.55556 |
| Female | 79 |            | 3/10/2008  | CC | GG | 0 | 0 | 27.20961 |
| Female | 75 |            | 3/31/2008  | TT | GT | 0 | 0 | 23.52941 |
| Female | 83 |            | 5/19/2008  | CT | GG | 0 | 0 | 26.07897 |
| Female | 76 | 2/10/2006  | 2/10/2006  | CC | GG | 1 | 1 | 19.69267 |
| Male   | 70 |            | 3/31/2008  | CC | TT | 1 | 0 | 31.57207 |
| Male   | 56 |            | 5/5/2008   | CT | GG | 0 | 0 | 24.21875 |
| Female | 82 | 8/17/2005  | 8/17/2005  | TT | GT | 0 | 1 | 22.14533 |
| Female | 76 | 9/6/2005   | 9/6/2005   | TT | GT | 0 | 1 | 21.7502  |
| Female | 84 |            | 4/14/2008  | CT | GT | 0 | 0 | 26.25958 |
| Female | 69 | 3/9/2007   | 3/9/2007   | TT | GT | 0 | 1 | 35.32124 |
| Male   | 74 |            | 5/26/2008  | CT | GT | 1 | 0 | 25.23634 |
| Female | 77 |            | 4/14/2008  | CC | GG | 0 | 0 | 20.93212 |
| Male   | 83 |            | 4/14/2008  | CT | GT | 1 | 0 | 24.91349 |
| Female | 72 |            | 3/31/2008  | CC | GG | 0 | 0 | 24.80159 |
| Female | 78 |            | 4/26/2005  | CC | TT | 0 | 0 | 19.72104 |
| Male   | 83 |            | 4/14/2008  | CC | GT | 1 | 0 | 22.58955 |
| Male   | 76 | 3/6/2007   | 3/6/2007   | CC | GG | 1 | 1 | 24.09297 |
| Female | 67 |            | 4/14/2008  | CT | TT | 0 | 0 | 26.37024 |
| Male   | 81 | 2/10/2006  | 2/10/2006  | CC | GG | 1 | 1 | 21.21832 |
| Male   | 78 | 5/19/2008  | 5/19/2008  | CC | GT | 1 | 1 | 22.26563 |
| Female | 62 |            | 5/19/2008  | CT | GG | 1 | 0 | 23.12467 |
| Male   | 72 |            | 5/26/2005  | CT | GT | 1 | 0 | 24.9989  |
| Female | 76 |            | 5/19/2008  | CC | GT | 1 | 0 | 25.03992 |
| Female | 68 |            | 5/5/2008   | TT | GT | 0 | 0 | 25.23634 |
| Female | 72 |            | 5/19/2008  | CT | TT | 0 | 0 | 26.21882 |
| Male   | 63 |            | 5/26/2008  | TT | TT | 0 | 0 | 25.71166 |
| Male   | 77 |            | 5/26/2008  | CT | TT | 1 | 0 |          |
| Female | 74 |            | 5/26/2008  | CT | TT | 1 | 0 | 26.17188 |
| Male   | 77 |            | 5/26/2008  | CC | GG | 0 | 0 | 27.74475 |
| Female | 79 |            | 6/9/2008   | TT | GG | 1 | 0 | 25.71166 |
| Female | 56 |            | 6/9/2008   | CC | GT | 0 | 0 | 21.77755 |
| Male   | 66 |            | 6/9/2008   | TT | GG | 0 | 0 | 30.11099 |
| Female | 78 | 4/3/2006   | 4/3/2006   | CT | TT | 0 | 1 | 27.4406  |
| Male   | 84 |            | 6/16/2005  | CC | GT | 1 | 0 | 16.52893 |
| Female | 74 | 6/20/2006  | 6/20/2006  | CT | GT | 0 | 1 | 18.66667 |
| Female | 58 |            | 6/2/2008   | CT | GT | 0 | 0 | 29.75779 |

## gen\_cnv

|        |    |            |            |    |    |   |   |          |
|--------|----|------------|------------|----|----|---|---|----------|
| Female | 75 | 9/7/2006   | 9/7/2006   | CT | GT | 1 | 1 | 23.50781 |
| Male   | 76 |            | 6/2/2008   | CC | GT | 1 | 0 | 27.14304 |
| Male   | 77 |            | 6/2/2008   | CT | GT | 1 | 0 | 32.03125 |
| Male   | 67 | 11/17/2005 | 11/17/2005 | CC | GG | 1 | 1 | 24.4898  |
| Female | 77 |            | 6/9/2008   | CT | TT | 0 | 0 | 23.66144 |
| Male   | 76 |            | 6/23/2008  | CC | GT | 1 | 0 | 36.1231  |
| Female | 71 | 2/26/2008  | 2/26/2008  | CT | GT | 0 | 1 | 24.24392 |
| Male   | 79 |            | 6/23/2008  | CT | GG | 1 | 0 | 24.69136 |
| Female | 81 | 5/14/2007  | 5/14/2007  | TT | TT | 0 | 1 | 32.87311 |
| Female | 74 |            | 6/23/2008  | CT | GG | 0 | 0 | 25.34435 |
| Male   | 72 |            | 6/23/2008  | CC | GT | 1 | 0 | 23.04688 |
| Male   | 79 |            | 9/1/2008   | CC | GG | 1 | 0 | 27.73438 |
| Female | 77 |            | 8/25/2008  | CT | GG | 0 | 0 | 25.10957 |
| Female | 78 |            | 8/25/2008  | TT | TT | 0 | 0 | 25.45807 |
| Female | 78 |            | 9/22/2008  | CT | GG | 0 | 0 | 27.46914 |
| Female | 65 | 2/16/2005  | 2/16/2005  | CT | GT | 0 | 1 | 25.71166 |
| Female | 71 |            | 9/1/2008   | TT | TT | 0 | 0 | 25.88757 |
| Female | 58 |            | 8/25/2008  | TT | GT | 1 | 0 | 37.46098 |
| Female | 73 |            | 9/1/2008   | CT | TT | 1 | 0 | 23.82813 |
| Male   | 70 |            | 9/15/2008  | CT | GT | 1 | 0 | 21.09619 |
| Female | 80 | 2/12/2007  | 2/12/2007  | CT | GT | 0 | 1 | 21.60494 |
| Male   | 72 | 3/10/2006  | 3/10/2006  | CT | GG | 0 | 1 | 25.05931 |
| Male   | 76 |            | 9/29/2008  | TT | GG | 1 | 0 | 22.03857 |
| Female | 59 |            | 9/15/2008  | CC | GT | 0 | 0 | 24.85795 |
| Female | 58 |            | 9/8/2008   | CC | GT | 0 | 0 | 24.60938 |
| Female | 82 |            | 9/15/2008  | TT | GG | 0 | 0 | 31.11111 |
| Male   | 80 |            | 9/8/2008   | CT | GT | 1 | 0 | 27.08416 |
| Male   | 73 |            | 9/8/2008   | CT | GG | 1 | 0 | 18.98659 |
| Male   | 70 |            | 9/15/2008  | TT | GT | 1 | 0 | 22.86237 |
| Male   | 72 |            | 9/8/2008   | CT | TT | 0 | 1 | 26.12861 |
| Male   | 84 |            | 9/1/2008   | TT | GT | 0 | 0 | 30.11028 |
| Female | 67 |            | 9/15/2008  | TT | TT | 0 | 0 | 21.48438 |
| Female | 56 | 9/26/2006  | 9/26/2006  | CC | GT | 0 | 1 | 24.16716 |
| Male   | 66 |            | 9/22/2008  | CC | TT | 0 | 0 | 21.87242 |
| Male   | 74 |            | 9/29/2008  | CC | TT | 1 | 0 | 25.88057 |
| Female | 74 | 1/6/2006   | 1/6/2006   | CT | GT | 0 | 1 | 22.58271 |
| Female | 84 | 9/15/2008  | 9/15/2008  | TT | GT | 0 | 1 | 25.52964 |
| Male   | 85 | 10/3/2006  | 10/3/2006  | CC | GT | 0 | 1 | 25       |
| Female | 77 |            | 9/29/2008  | CT | GG | 0 | 0 | 29.6875  |
| Female | 73 | 3/17/2006  | 3/17/2006  | TT | GG | 0 | 1 | 21.96712 |
| Female | 76 |            | 9/29/2008  | CT | GT | 0 | 0 | 29.27099 |
| Male   | 70 |            | 9/22/2008  | CT | TT | 1 | 0 | 23.03005 |
| Female | 62 |            | 9/29/2008  | CT | TT | 1 | 0 |          |
