# Supplementary material for: CFH Y402H and ARMS2 A69S Polymorphisms and Oral Supplementation with Docosahexaenoic Acid in Neovascular Age-Related Macular Degeneration Patients: The NAT2 Study
Source: PLoS One. 2015 Jul 1;10(7):e0130816. doi: 10.1371/journal.pone.0130816 (PMC4489493; doi:10.1371/journal.pone.0130816)
Supplement: S1 File — (PDF) [file pone.0130816.s001.pdf]

**COMITE CONSULTATIF POUR LA PROTECTION DES PERSONNES  
DANS LA RECHERCHE BIOMEDICALE  
ILE DE FRANCE - PARIS - ST ANTOINE**

Président :  
V.G. LEVY  
Vice-Président :  
C. GRICOURT  
Secrétaire général :  
J.L. PRUGNAUD  
Secrét. général adjoint :  
F. BERGIER DESCOMBES  
Trésorier :  
G. ETIENNE  
Trésorier adjoint :  
B. NALPAS

Monsieur le Docteur E. SOUJED  
Clinique ophtalmologique  
Universitaire de Créteil  
40, avenue de Verdun  
94010 CRETEIL Cedex

Projet de recherche biomédicale enregistré sous le numéro: 03562

Le Comité a été saisi le 13 juin 2003

Par Monsieur le Docteur Eric SOUJED

du projet de recherche biomédicale suivant: (Recherche Avec Bénéfice Individuel Direct).

Etude comparative, parallèle, randomisée, en double insu d'un supplément nutritionnel oral contenant du DHA (acide docosahexaénoïque) versus placebo dans la prévention de la dégénérescence maculaire liée à l'âge. Etude NAT 2.

Dont le promoteur est : Bauwch&Lomb/Chauvin

Le Comité a examiné les informations relatives à ce projet lors de la séance du mardi 1<sup>er</sup> juillet 2003.

Les rapporteurs mandatés étaient: Mme SCHIMPF, Mme ROSENZWEIG

(\*) Ont participé à la délibération : Mmes DEBRU(5), DELZANT(1), DUBOULOY(4), KURTZ(7), SCHIMPF(1).

MM. ETIENNE(3), LEVY(1), NALPAS(1), POUILLARD(2), PRUGNAUD(3).

(1) Médecins, recherche bio-médicale, (2) Médecins, (3) Pharmaciens,  
(4) Infirmières, (5) Ethique, (6) Social, (7) Psychologue, (8) Juridique

**Le Comité a adopté la décision suivante : Avis favorable, les modifications demandées ayant été reçues.**

FAIT A PARIS, le 22 juillet 2003

Le Président

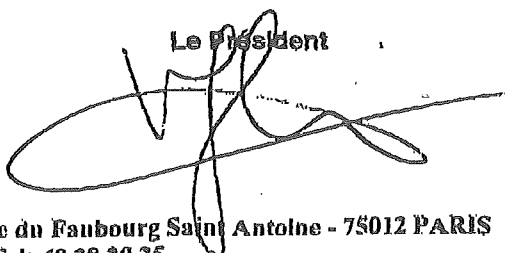

Hôpital Saint Antoine - 184 rue du Faubourg Saint Antoine - 75012 PARIS  
Tel: 49 28 20 25  
Fax: 49 28 20 46

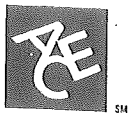

ace europe

ACE Insurance S.A.-N.V.  
Le Colisée  
8, avenue de l'Arche  
92419 Courbevoie Cedex

33 (0)1 55 91 45 45 tél  
33 (0)1 47 88 45 10 fax  
www.aceeurope.com

## ATTESTATION D'ASSURANCE

### RESPONSABILITE CIVILE

### PROMOTEUR DE RECHERCHES BIOMEDICALES

Nous soussignés, ACE Insurance S.A – N.V, Immeuble le Colisée 8, avenue de l'Arche, 92419 Courbevoie Cedex attestons que :

#### LABORATOIRES CHAUVIN

Parc Millénaire II  
416, rue Samuel Morse  
B.P 1174  
34009 MONTPELLIER CEDEX

agissant en tant que PROMOTEUR,

est assuré par un contrat de Responsabilité Civile référencé **5.323.978** souscrit à effet du **1<sup>er</sup> Juin 2003** et conforme aux dispositions légales et réglementaires françaises sur les recherches bio-médicales et notamment aux dispositions de la loi n° 88.1138 du 20.12.88, modifiée par la loi n° 90-86 du 23.01.90, du décret n° 91.440 du 14.05.91 et par la loi n° 94.630 du 25.07.1994.

Titre de la recherche assurée :

Double-masked, randomised, parallel, comparative study of oral supplementation with DHA (Docosahexaenoic acid) versus placebo in the prevention of age-related macular degeneration.  
NAT 2

|                                       |                 |
|---------------------------------------|-----------------|
| Référence de l'étude                  | : NAT 2         |
| Phase                                 | : NA            |
| Nombre de patients                    | : 350           |
| Date de début de l'étude              | : octobre 2003  |
| Date prévisionnelle de fin de l'étude | : Décembre 2008 |

#### LIMITES DE GARANTIE :

762.245 Euros par Victime.  
4.573.471 Euros par protocole de recherche.  
7.622.451 Euros par année d'assurance.

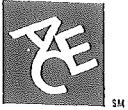

**ace europe**

ACE Insurance S.A.-N.V.  
Le Colisée  
8, avenue de l'Arche  
92419 Courbevoie Cedex

33 (0)1 55 91 45 45 tél  
33 (0)1 47 88 45 10 fax  
[www.aceeurope.com](http://www.aceeurope.com)

La garantie est conforme à l'obligation d'assurance instituée par les textes de loi précités, article L 209-7 à la charge du promoteur, tant pour sa propre responsabilité que pour celle des intervenants.

La présente attestation est délivrée pour être remise au Comité Consultatif de Protection des Personnes.

Fait à Courbevoie, le 11 avril 2003
